# Supplementary material for: Adherence to Eye Drops Usage in Dry Eye Patients and Reasons for Non-Compliance: A Web-Based Survey
Source: MDPI journal article supplement (doi:10.3390/jcm11020367), 2022-01-12
Supplement: s1 [file s1]

**Table S4. Differences in usage patterns among patients using the three types of DED eye drops.**

| Usage pattern, <i>n</i> (%)                                                                                                           | DQS<br>( <i>n</i> =1,100) | HA<br>( <i>n</i> =1,100) | RBM<br>( <i>n</i> =445) |
|---------------------------------------------------------------------------------------------------------------------------------------|---------------------------|--------------------------|-------------------------|
| Instillation Behavior                                                                                                                 |                           |                          |                         |
| Participants who instilled the DED eye drops at a fixed frequency regardless of whether they had subjective symptoms                  | 431 (39.2)                | 370 (33.6)               | 185 (41.6)              |
| Participants who instilled the DED eye drops when they felt subjective symptoms                                                       | 650 (59.1)                | 718 (65.3)               | 254 (57.1)              |
| Others                                                                                                                                | 19 (1.7)                  | 12 (1.1)                 | 6 (1.3)                 |
| Medication instruction                                                                                                                |                           |                          |                         |
| Participants who were instructed to instill the DED eye drops at a fixed frequency regardless of whether they had subjective symptoms | 615 (55.9)                | 513 (46.6)               | 241 (54.2)              |
| Participants who were instructed to instill the DED eye drops when they felt subjective symptoms                                      | 341 (31.0)                | 395 (35.9)               | 164 (36.9)              |
| Others                                                                                                                                | 9 (0.8)                   | 10 (0.9)                 | 2 (0.4)                 |
| Unable to recall the instructions or were not instructed                                                                              | 135 (12.3)                | 182 (16.5)               | 38 (8.5)                |

Subjective symptoms related to DED represented dryness, eye fatigue, etc. DQS: 3% diquafosol sodium ophthalmic solution; HA: sodium hyaluronate ophthalmic solution; RBM: 2% rebamipide ophthalmic suspension, DED: dry eye disease.
