# Supplementary material for: Adherence to Eye Drops Usage in Dry Eye Patients and Reasons for Non-Compliance: A Web-Based Survey
Source: MDPI journal article supplement (doi:10.3390/jcm11020367), 2022-01-12
Supplement: s1 [file s1]

**Table S6. The treatment details for patients in the fixed-use and non-fixed use groups by eye drop type (DQS, HA, and RBM).**

| Background factors                                                        | DQS                       |                                  |                   | HA                        |                                  |                   | RBM                       |                                |                   |
|---------------------------------------------------------------------------|---------------------------|----------------------------------|-------------------|---------------------------|----------------------------------|-------------------|---------------------------|--------------------------------|-------------------|
|                                                                           | Fixed-Use Group<br>(n=63) | Non-Fixed Use Group<br>(n=1,037) | <i>p</i> -Value   | Fixed-Use Group<br>(n=47) | Non-Fixed Use Group<br>(n=1,035) | <i>p</i> -Value   | Fixed-Use Group<br>(n=43) | Non-Fixed Use Group<br>(n=402) | <i>p</i> -Value   |
| Frequency of instillation of DED eye drops (days per month), <i>n</i> (%) |                           |                                  |                   |                           |                                  |                   |                           |                                |                   |
| Almost every day                                                          | 61 (96.8)                 | 695 (67.0)                       | <0.01**           | 44 (93.6)                 | 715 (67.9)                       | < 0.01**          | 41 (97.7)                 | 235 (58.5)                     | <0.01**           |
| About 15 days                                                             | 1 (1.6)                   | 189 (18.2)                       |                   | 2 (4.3)                   | 188 (17.9)                       |                   | 1 (2.3)                   | 89 (22.1)                      |                   |
| A few days                                                                | 1 (1.6)                   | 124 (12.0)                       |                   | 0 (0.0)                   | 94 (8.9)                         |                   | 0 (0.0)                   | 58 (14.4)                      |                   |
| Rarely                                                                    | 0 (0.0)                   | 29 (2.8)                         |                   | 1 (2.1)                   | 56 (5.3)                         |                   | 0 (0.0)                   | 20 (5.0)                       |                   |
| Duration of treatment for DED, <i>n</i> (%)                               |                           |                                  |                   |                           |                                  |                   |                           |                                |                   |
| 1 - 3 months                                                              | 7 (11.1)                  | 126 (12.2)                       | 0.72              | 3 (6.4)                   | 87 (8.3)                         | 0.18              | 9 (20.9)                  | 57 (14.2)                      | 0.28              |
| 3 - 6 months                                                              | 11 (17.5)                 | 143 (13.8)                       |                   | 2 (4.3)                   | 105 (10.0)                       |                   | 4 (9.3)                   | 65 (16.2)                      |                   |
| 6 months to 1 year                                                        | 8 (12.7)                  | 139 (13.4)                       |                   | 5 (10.6)                  | 102 (9.7)                        |                   | 2 (4.7)                   | 69 (17.2)                      |                   |
| 1 year to 3 years                                                         | 21 (33.3)                 | 344 (33.2)                       |                   | 13 (27.7)                 | 316 (30.0)                       |                   | 11 (25.6)                 | 101 (25.1)                     |                   |
| At least 3 years                                                          | 16 (25.4)                 | 285 (27.5)                       |                   | 24 (51.1)                 | 443 (42.1)                       |                   | 17 (39.5)                 | 110 (27.4)                     |                   |
| Treatment for DED other than DQS, HA, or RBM, <i>n</i> (%)                |                           |                                  |                   |                           |                                  |                   |                           |                                |                   |
| Total                                                                     | 10 (15.9)                 | 274 (26.4)                       | < 0.01##          | 30 (63.8)                 | 622 (59.1)                       | 0.55              | 12 (27.9)                 | 196 (48.8)                     | < 0.01##          |
| Steroid eye drops                                                         | 5 (7.9)                   | 81 (7.8)                         | 0.02 <sup>‡</sup> | 2 (4.3)                   | 50 (4.7)                         | 1.00              | 1 (2.3)                   | 7 (1.7)                        | 0.02 <sup>‡</sup> |
| Artificial sodium                                                         | 1 (1.6)                   | 105 (10.1)                       | 1.00              | 7 (14.9)                  | 109 (10.4)                       | 0.33              | 4 (9.3)                   | 3 (0.7)                        | 0.63              |
| Hyaluronic acid (over-the-counter)                                        | -                         | -                                | -                 | 18 (38.3)                 | 404 (38.4)                       | 1.00              | -                         | -                              | -                 |
| Oral drugs                                                                | 0 (0.0)                   | 3 (0.3)                          | 0.04 <sup>‡</sup> | 0 (0.0)                   | 8 (0.8)                          | 0.02 <sup>‡</sup> | 1 (2.3)                   | 12 (3.0)                       | 1.00              |
| Over-the-counter eye drops                                                | 3 (4.8)                   | 149 (14.4)                       | 0.72              | 1 (2.1)                   | 134 (12.7)                       | 0.05              | 7 (16.3)                  | 92 (22.9)                      | 0.44              |
| Others                                                                    | 1 (1.6)                   | 33 (3.2)                         | < 0.01##          | 3 (6.4)                   | 18 (1.7)                         | 0.55              | 0 (0.0)                   | 3 (0.7)                        | 1.00              |

DQS: 3% diquafosol sodium ophthalmic solution; HA: sodium hyaluronate ophthalmic solution; RBM: 2% rebamipide ophthalmic suspension; DED: dry eye disease; Oral drugs: pregabalin, carbamazepine, duloxetine hydrochloride, mirogabalin besilate. \*\*P<0.01, Mann-Whitney U-test. <sup>‡</sup>P<0.05, ##P<0.01, Fisher exact test.
