# Supplementary material for: Adherence to Eye Drops Usage in Dry Eye Patients and Reasons for Non-Compliance: A Web-Based Survey
Source: MDPI journal article supplement (doi:10.3390/jcm11020367), 2022-01-12
Supplement: s1 [file s1]

Table S3. Distribution of participants who answered the frequency instructed by their ophthalmologist or pharmacists for the three types of DED eye drops .

| Frequency (times per day) instructed by their ophthalmologist or pharmacists, <i>n</i> (%) | DQS<br>( <i>n</i> =1,100) | HA<br>( <i>n</i> =1,100) | RBM<br>( <i>n</i> =445) |
|--------------------------------------------------------------------------------------------|---------------------------|--------------------------|-------------------------|
| Once                                                                                       | 23 (2.1)                  | 13 (1.2)                 | 25 (5.6)                |
| Twice                                                                                      | 50 (4.5)                  | 57 (5.2)                 | 66 (14.8)               |
| 3 times                                                                                    | 199 (18.1)                | 244 (22.2)               | 99 (22.2)               |
| 4 times                                                                                    | 242 (22.0)                | 279 (25.4)               | 128 (28.8)              |
| 5 times                                                                                    | 84 (7.6)                  | 62 (5.6)                 | 6 (1.3)                 |
| 6 times                                                                                    | 219 (19.9)                | 75 (6.8)                 | 4 (0.9)                 |
| 7 times                                                                                    | 4 (0.4)                   | 3 (0.3)                  | 1 (0.2)                 |
| 8 times and more                                                                           | 9 (0.8)                   | 3 (0.3)                  | 2 (0.4)                 |
| The frequency of my eye drop usage varies, not a fixed frequency                           | 195 (17.7)                | 269 (24.5)               | 76 (17.1)               |
| Unable to recall the instructions or not instructed                                        | 75 (6.8)                  | 95 (8.6)                 | 38 (8.5)                |

DQS: 3% diquafosol sodium ophthalmic solution; HA: sodium hyaluronate ophthalmic solution; RBM: 2% rebamipide ophthalmic suspension.
