# Supplementary material for: Adherence to Eye Drops Usage in Dry Eye Patients and Reasons for Non-Compliance: A Web-Based Survey
Source: MDPI journal article supplement (doi:10.3390/jcm11020367), 2022-01-12
Supplement: s1 [file s1]

**Table S5. The background information of patients in the fixed-use and non-fixed use groups using the 3 DED eye drop types (DQS, HA, and RBM).**

| Demographic Characteristics         | DQS             |                     |                   | HA              |                     |                 | RBM             |                     |                     |
|-------------------------------------|-----------------|---------------------|-------------------|-----------------|---------------------|-----------------|-----------------|---------------------|---------------------|
|                                     | Fixed-Use Group | Non-Fixed Use Group | <i>p</i> -Value   | Fixed-Use Group | Non-Fixed Use Group | <i>p</i> -Value | Fixed-Use Group | Non-Fixed Use Group | <i>p</i> -Value     |
| Number of participants analyzed     | 63(5.7)         | 1037(94.2)          |                   | 47(4.3)         | 1053(95.7)          |                 | 43(9.7)         | 402(90.3)           |                     |
| Age category, <i>n</i> (%)          |                 |                     |                   |                 |                     |                 |                 |                     |                     |
| 20-29                               | 0 (0.0)         | 50 (4.8)            | 0.42              | 0 (0.0)         | 28 (2.7)            | 0.38            | 1 (2.3)         | 19 (4.7)            | < 0.01**            |
| 30-39                               | 9 (14.3)        | 168 (16.2)          |                   | 6 (12.8)        | 129 (12.3)          |                 | 5 (11.6)        | 64 (15.9)           |                     |
| 40-49                               | 17 (27.0)       | 238 (23.0)          |                   | 8 (17.0)        | 225 (21.4)          |                 | 3 (7.0)         | 95 (23.6)           |                     |
| 50-59                               | 19 (30.2)       | 291 (28.1)          |                   | 11 (23.4)       | 251 (23.8)          |                 | 13 (30.2)       | 112 (27.9)          |                     |
| 60-69                               | 11 (17.5)       | 196 (18.9)          |                   | 14 (29.8)       | 237 (22.5)          |                 | 14 (32.6)       | 70 (17.4)           |                     |
| 70-79                               | 7 (11.1)        | 86 (8.3)            |                   | 7 (14.9)        | 175 (16.6)          |                 | 7 (16.3)        | 41 (10.2)           |                     |
| 80 over                             | 0 (0.0)         | 8 (0.8)             |                   | 1 (2.1)         | 9 (0.8)             |                 | 0 (0.0)         | 1 (0.2)             |                     |
| Male, <i>n</i> (%)                  | 25 (39.7)       | 416 (40.1)          | 1.00              | 21 (44.7)       | 422 (40.1)          | 0.55            | 15 (34.9)       | 183 (45.5)          | 0.20                |
| Daily CL use, <i>n</i> (%)          | 15 (23.8)       | 350 (33.8)          | 0.13              | 7 (14.9)        | 272 (25.8)          | 0.12            | 6 (14.0)        | 127 (31.6)          | 0.01 <sup>#</sup>   |
| VDT hours, mean ± SD                | 5.8±3.3         | 5.6±3.3             | 0.66              | 5.8±2.8         | 5.6±3.3             | 0.68            | 5.5±2.9         | 5.7±3.3             | 0.56                |
| Smoking, <i>n</i> (%)               | 8 (12.7)        | 147 (14.2)          | 0.85              | 5 (10.6)        | 147 (14.0)          | 0.67            | 4 (9.3)         | 103 (25.6)          | 0.01 <sup>#</sup>   |
| Years after diagnosis, mean ± SD    | 4.8±6.2         | 5.2±5.4             | 0.19              | 6.5±4.9         | 7.2±6.8             | 0.86            | 5.8±5.3         | 5.6±5.5             | 0.67                |
| Ocular complications, <i>n</i> (%)  |                 |                     |                   |                 |                     |                 |                 |                     |                     |
| Total                               | 6 (9.5)         | 114 (11.0)          | 0.84              | 5 (10.6)        | 154 (14.6)          | 0.53            | 9 (20.9)        | 51 (12.7)           | 0.16                |
| Cataract                            | 4 (6.3)         | 71 (6.8)            | 1.00              | 5 (10.6)        | 89 (8.5)            | 0.59            | 5 (11.6)        | 31 (7.7)            | 0.37                |
| Glaucoma                            | 0 (0.0)         | 5 (0.5)             | 1.00              | 1 (2.1)         | 11 (1.0)            | 0.41            | 0 (0.0)         | 3 (0.7)             | 1.00                |
| Allergic conjunctivitis             | 0 (0.0)         | 17 (1.6)            | 0.62              | 0 (0.0)         | 21 (2.0)            | 1.00            | 1 (2.3)         | 14 (3.5)            | 1.00                |
| Others                              | 2 (3.2)         | 26 (2.5)            | 0.67              | 0 (0.0)         | 40 (3.8)            | 0.41            | 4 (9.3)         | 4 (1.0)             | < 0.01 <sup>#</sup> |
| Systemic complication, <i>n</i> (%) |                 |                     |                   |                 |                     |                 |                 |                     |                     |
| Total                               | 21 (33.3)       | 274 (26.4)          | 0.24              | 13 (27.7)       | 324 (30.8)          | 0.75            | 13 (30.2)       | 125 (31.1)          | 1.00                |
| Sjögren's syndrome                  | 3 (4.8)         | 15 (1.4)            | 0.08              | 1 (2.1)         | 19 (1.8)            | 0.59            | 1 (2.3)         | 7 (1.7)             | 0.56                |
| Rheumatoid arthritis                | 4 (6.3)         | 15 (1.4)            | 0.02 <sup>#</sup> | 0 (0.0)         | 19 (1.8)            | 1.00            | 3 (7.0)         | 3 (0.7)             | 0.01                |
| Hypothyroidism                      | 1 (1.6)         | 15 (1.4)            | 0.61              | 1 (2.1)         | 20 (1.9)            | 0.60            | 1 (2.3)         | 8 (2.0)             | 0.60                |
| Hypertension                        | 11 (17.5)       | 150 (14.5)          | 0.47              | 11 (23.4)       | 193 (18.3)          | 0.44            | 8 (18.6)        | 63 (15.7)           | 0.66                |
| Insomnia                            | 5 (7.9)         | 80 (7.7)            | 0.81              | 1 (2.1)         | 70 (6.6)            | 0.36            | 1 (2.3)         | 51 (12.7)           | 0.04 <sup>#</sup>   |
| Depressive illness                  | 3 (4.8)         | 47 (4.5)            | 0.76              | 0 (0.0)         | 49 (4.7)            | 0.26            | 2 (4.7)         | 31 (7.7)            | 0.76                |
| Connective tissue disease           | 3 (4.8)         | 17 (1.6)            | 0.10              | 1 (2.1)         | 16 (1.5)            | 0.53            | 0 (0.0)         | 3 (0.7)             | 1.00                |

CL: contact lens; SD: standard deviation; DQS: 3% diquafosol sodium ophthalmic solution; HA: sodium hyaluronate ophthalmic solution; RBM: 2% rebamipide ophthalmic suspension;

DED: dry eye disease; VDT: video display terminal. \**P*<0.05, \*\**P*<0.01, Mann-Whitney U-test. <sup>#</sup>*P*<0.05, Fisher exact test.
