# Supplementary material for: Adherence to Eye Drops Usage in Dry Eye Patients and Reasons for Non-Compliance: A Web-Based Survey
Source: MDPI journal article supplement (doi:10.3390/jcm11020367), 2022-01-12
Supplement: s1 [file s1]

**Table S2.** The treatment details of participants according to DED eye drop type.

| Demographic characteristics, <i>n</i> (%)                   | DQS<br>( <i>n</i> =1,100) | HA<br>( <i>n</i> =1,100) | RBM<br>( <i>n</i> =445) |
|-------------------------------------------------------------|---------------------------|--------------------------|-------------------------|
| Frequency of instillation of DED eye drops (days per month) |                           |                          |                         |
| Almost every day                                            | 756 (68.7)                | 759 (69.0)               | 277 (62.2)              |
| About 15 days                                               | 190 (17.3)                | 190 (17.3)               | 90 (20.2)               |
| A few days                                                  | 125 (11.4)                | 94 (8.5)                 | 58 (13.0)               |
| Rarely                                                      | 29 (2.6)                  | 57 (5.2)                 | 20 (4.5)                |
| Duration of treatment for DED                               |                           |                          |                         |
| 1 - 3 months                                                | 133 (12.1)                | 90 (8.2)                 | 66 (14.8)               |
| 3 - 6 months                                                | 154 (14.0)                | 107 (9.7)                | 69 (15.5)               |
| 6 months to 1 year                                          | 147 (13.4)                | 107 (9.7)                | 71 (16.0)               |
| 1 year to 3 years                                           | 365 (33.2)                | 329 (29.9)               | 112 (25.2)              |
| At least 3 years                                            | 301 (27.4)                | 467 (42.5)               | 127 (28.5)              |
| Treatment for DED other than DQS, HA, or RBM                |                           |                          |                         |
| Total                                                       | 354 (32.2)                | 652 (59.3)               | 208 (46.7)              |
| Steroid eye drops                                           | 86 (7.8)                  | 52 (4.7)                 | 61 (13.7)               |
| Artificial sodium                                           | 106 (9.6)                 | 116 (10.5)               | 59 (13.3)               |
| Hyaluronic acid (over-the-counter)                          | -                         | 422 (38.4)               | -                       |
| Oral drugs                                                  | 3 (0.3)                   | 8 (0.7)                  | 13 (2.9)                |
| Over-the-counter eye drops                                  | 152 (13.8)                | 135 (12.3)               | 99 (22.2)               |
| Others                                                      | 34 (3.1)                  | 21 (1.9)                 | 5 (1.1)                 |

SD: standard deviation; DQS: 3% diquafosol sodium ophthalmic solution; HA: sodium hyaluronate ophthalmic solution; RBM: 2% rebamipide ophthalmic suspension; DED: dry eye disease; Oral drugs: any of the following; pregabalin, carbamazepine, duloxetine hydrochloride, and mirogabalin besilate.
