# Supplementary material for: Adherence to Eye Drops Usage in Dry Eye Patients and Reasons for Non-Compliance: A Web-Based Survey
Source: MDPI journal article supplement (doi:10.3390/jcm11020367), 2022-01-12
Supplement: s1 [file s1]

**Table S1.** The background information of the participants who used the three types of DED eye drops.

| Demographic characteristics          | DQS<br>( <i>n</i> =1,100) | HA<br>( <i>n</i> =1,100) | RBM<br>( <i>n</i> =445) |
|--------------------------------------|---------------------------|--------------------------|-------------------------|
| Age category, <i>n</i> (%)           |                           |                          |                         |
| 20-29                                | 50 (4.5)                  | 28 (2.5)                 | 20 (4.5)                |
| 30-39                                | 177 (16.1)                | 135 (12.3)               | 69 (15.5)               |
| 40-49                                | 255 (23.2)                | 233 (21.2)               | 98 (22.0)               |
| 50-59                                | 310 (28.2)                | 262 (23.8)               | 125 (28.1)              |
| 60-69                                | 207 (18.8)                | 251 (22.8)               | 84 (18.9)               |
| 70-79                                | 93 (8.5)                  | 182 (16.5)               | 48 (10.8)               |
| 80 years and over                    | 8 (0.7)                   | 9 (0.8)                  | 1 (0.2)                 |
| Male, <i>n</i> (%)                   | 441 (40.1)                | 443 (40.3)               | 198 (44.5)              |
| Daily CL use, <i>n</i> (%)           | 365 (33.2)                | 279 (25.4)               | 133 (29.9)              |
| VDT hours, mean $\pm$ SD             | 5.6 $\pm$ 3.3             | 5.6 $\pm$ 3.3            | 5.7 $\pm$ 3.3           |
| Smoking, <i>n</i> (%)                | 155 (14.1)                | 152 (13.8)               | 107 (24.0)              |
| Years after diagnosis, mean $\pm$ SD | 5.2 $\pm$ 5.4             | 7.2 $\pm$ 6.7            | 5.6 $\pm$ 5.5           |
| Ocular complications, <i>n</i> (%)   |                           |                          |                         |
| Total                                | 120 (10.9)                | 159 (14.5)               | 60 (13.5)               |
| Cataract                             | 75 (6.8)                  | 94 (8.5)                 | 36 (8.1)                |
| Glaucoma                             | 5 (0.5)                   | 12 (1.1)                 | 3 (0.7)                 |
| Allergic conjunctivitis              | 17 (1.5)                  | 21 (1.9)                 | 15 (3.4)                |
| Others                               | 28 (2.5)                  | 40 (3.6)                 | 8 (1.8)                 |
| Systemic complications, <i>n</i> (%) |                           |                          |                         |
| Total                                | 295 (26.8)                | 337 (30.6)               | 138 (31.0)              |
| Sjögren's syndrome                   | 18 (1.6)                  | 20 (1.8)                 | 8 (1.8)                 |
| Rheumatoid arthritis                 | 19 (1.7)                  | 19 (1.7)                 | 6 (1.3)                 |
| Hypothyroidism                       | 16 (1.5)                  | 21 (1.9)                 | 9 (2.0)                 |
| Hypertension                         | 161 (14.6)                | 204 (18.5)               | 71 (16.0)               |
| Insomnia                             | 85 (7.7)                  | 71 (6.5)                 | 52 (11.7)               |
| Depressive illness                   | 50 (4.5)                  | 49 (4.5)                 | 33 (7.4)                |
| Connective tissue disease            | 20 (1.8)                  | 17 (1.5)                 | 3 (0.7)                 |

SD: standard deviation; DQS: 3% diquafosol sodium ophthalmic solution; HA: sodium hyaluronate ophthalmic solution; RBM: 2% rebamipide ophthalmic suspension; DED: dry eye disease; CL: contact lens; VDT: video display terminal.
